# Supplementary material for: Influence of Adipose Tissue Distribution, Sarcopenia, and Nutritional Status on Clinical Outcomes After CD19 CAR T-cell Therapy
Source: PubMed Central journal article supplement — Cancer Immunol Res. 2023 Apr 11;11(6):707–19. doi: 10.1158/2326-6066.CIR-22-0487 (PMC10236147; doi:10.1158/2326-6066.cir-22-0487), 2023-04-11
Supplement: cir-22-0487_supplementary_figures_suppsf1-sf6.pdf [file cir-22-0487_supplementary_figures_suppsf1-sf6.pdf]

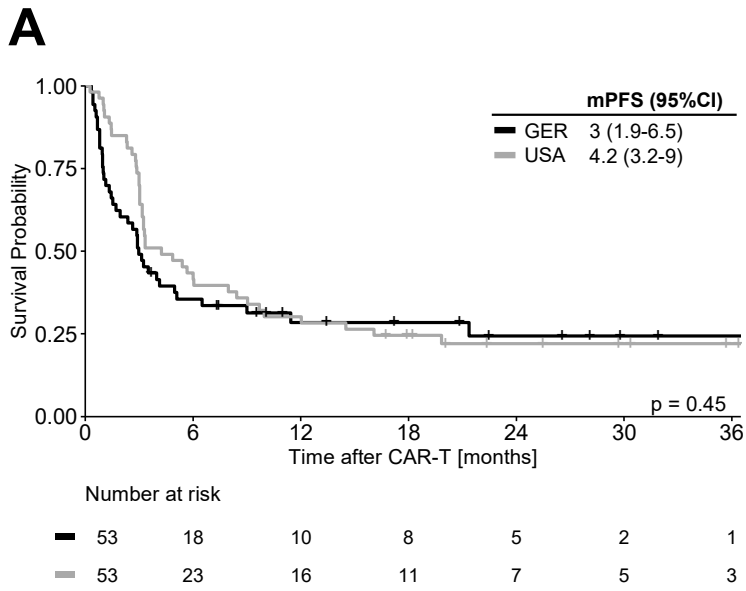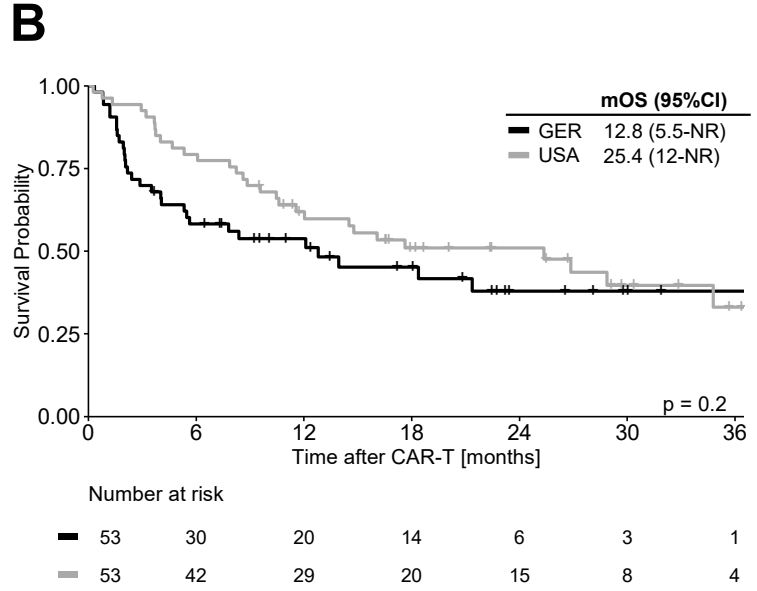

**Fig. S1 Survival outcomes of CD19.CAR-T r/r LBCL patients are similar in Germany and the USA. Kaplan Meier estimates.** Kaplan-Meier estimates of progression-free survival (A) and overall survival (B) stratified by treatment location (black line = Germany, grey line = USA). The p-value of the Mantel-Cox Log-rank test is denoted on the graph inset. Abbreviations: 95%CI = 95% confidence interval, mPFS = median progression-free survival, mOS = median overall survival.

### 1-year Non-Relapse Mortality

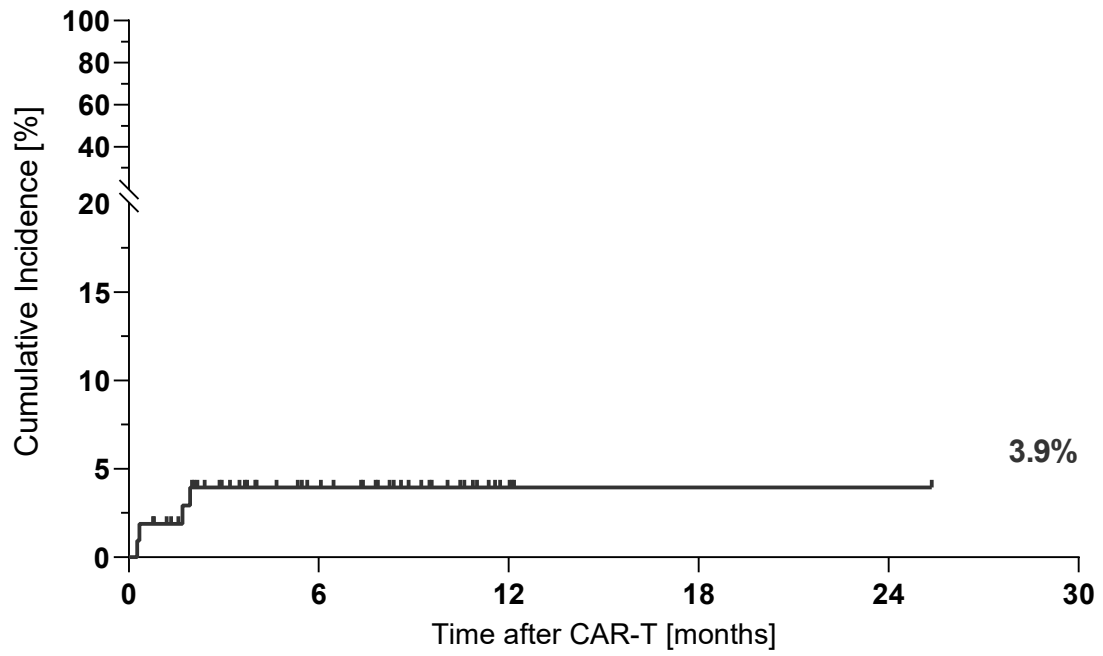

**Fig. S2 Cumulative incidence of non-relapse mortality.**

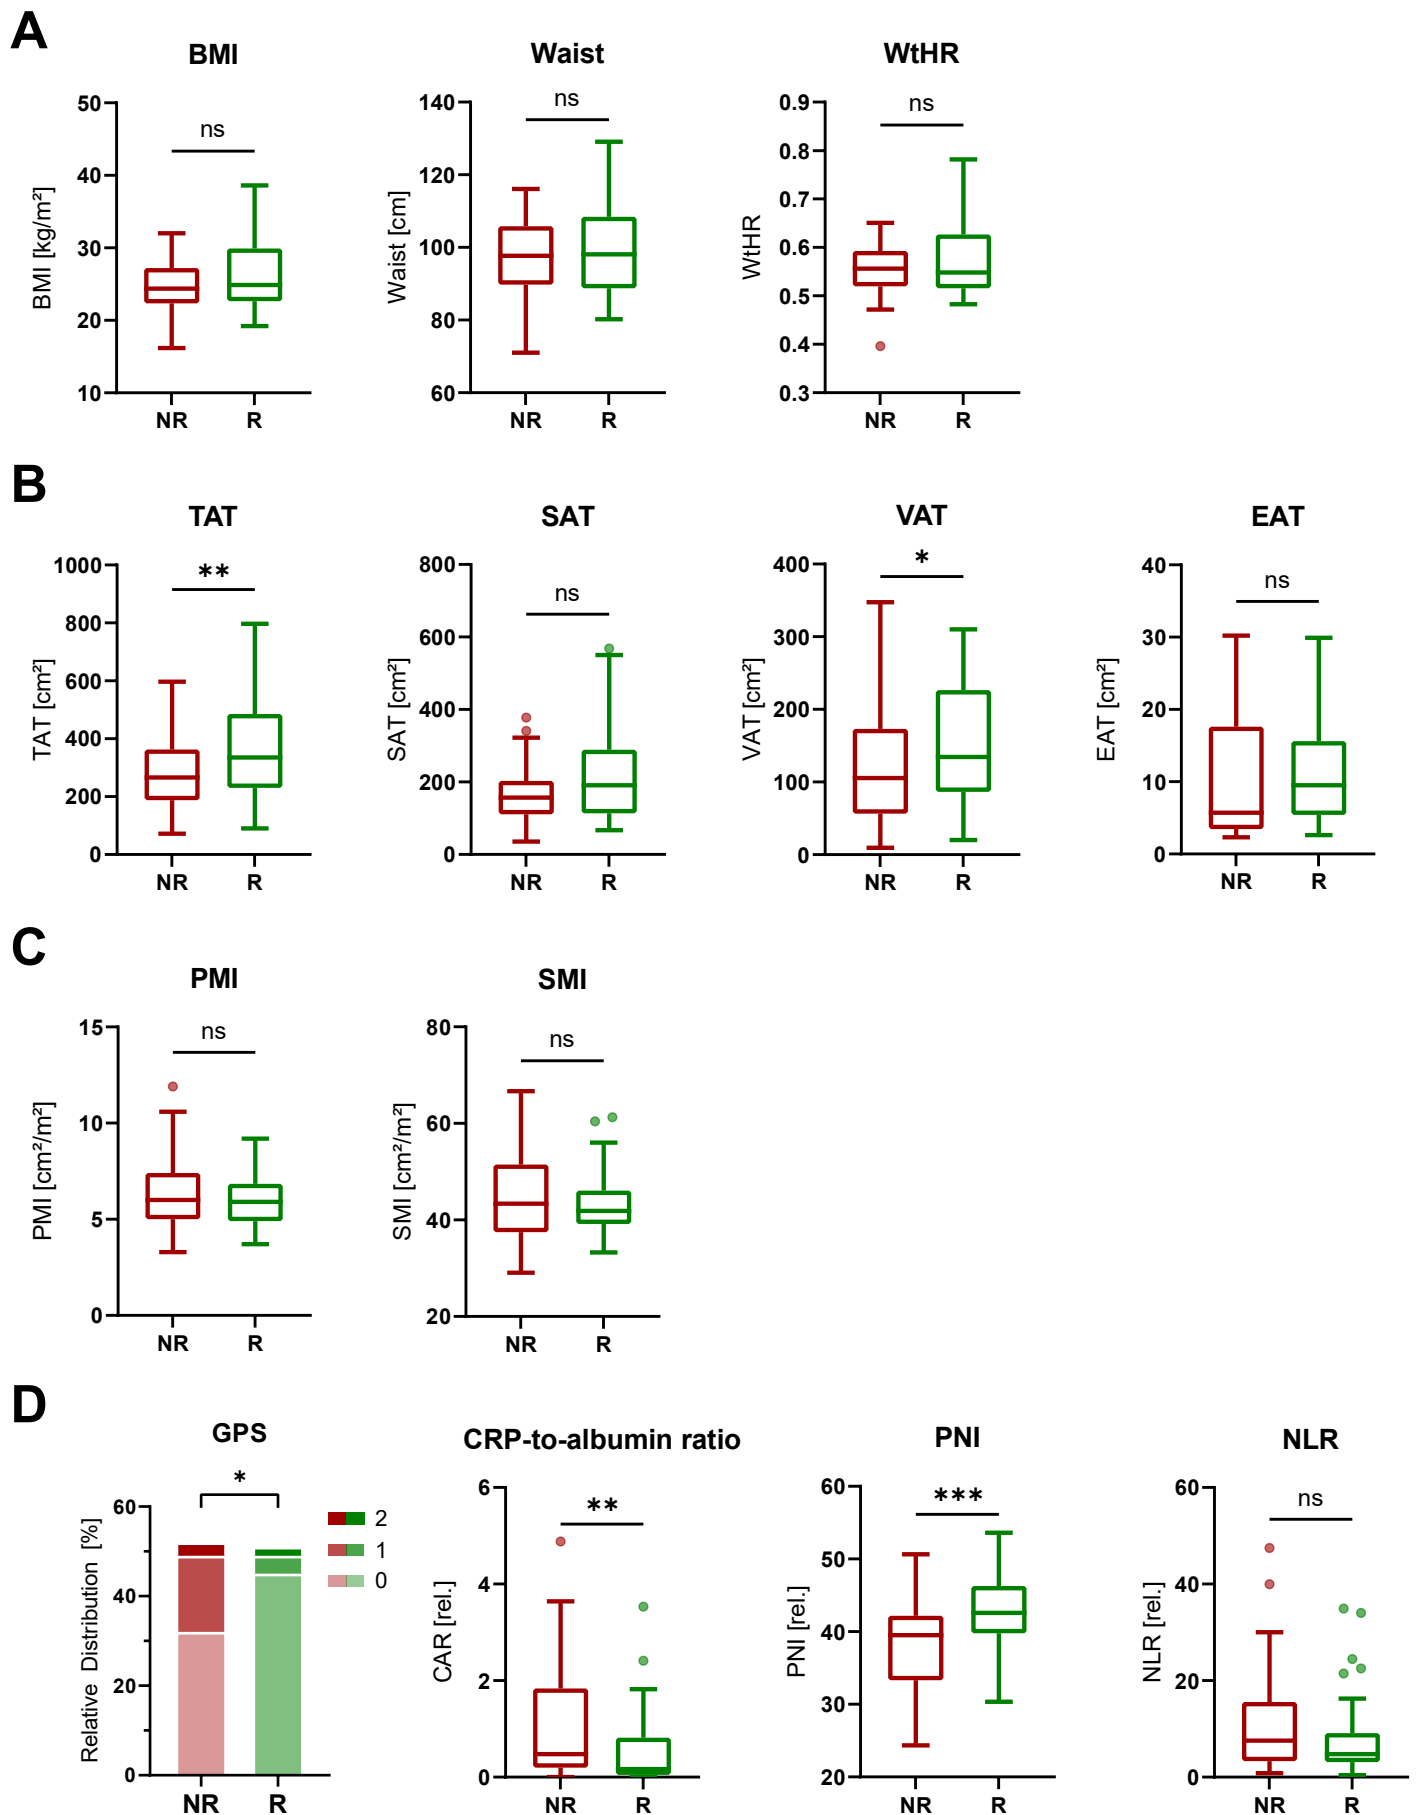

**Fig. S3 Early responders to CD19.CAR-T display increased adipose tissue deposits and favorable nutritional inflammation scores.** Box plots comparing early (day 90) responders (R) vs. non-responders (NR) to CD19.CAR-T in terms of (A) anthropometric features, (B) adipose tissue distribution, (C) muscle tissue distribution, (D) and nutritional inflammation scores. A From left to right: body mass index (BMI), waist circumference (Waist), Waist-to-Height-ratio (WtHR). B From left to right: total (TAT), subcutaneous (SAT), visceral (VAT), and epicardial adipose tissue (EAT) deposits. C From left to right: psoas muscle index (PMI) and skeletal muscle index (SMI). D From left to right: Glasgow Prognostic Score (GPS), CRP-to-Albumin ratio (CAR), Prognostic Nutritional Index (PNI), and Neutrophil-to-Lymphocyte ratio (NLR). Box and whiskers indicate the median and 95% confidence interval; respective p-values are denoted above the graph (\* p < 0.05, \*\* p < 0.01, \*\*\* p < 0.001, ns = not significant).

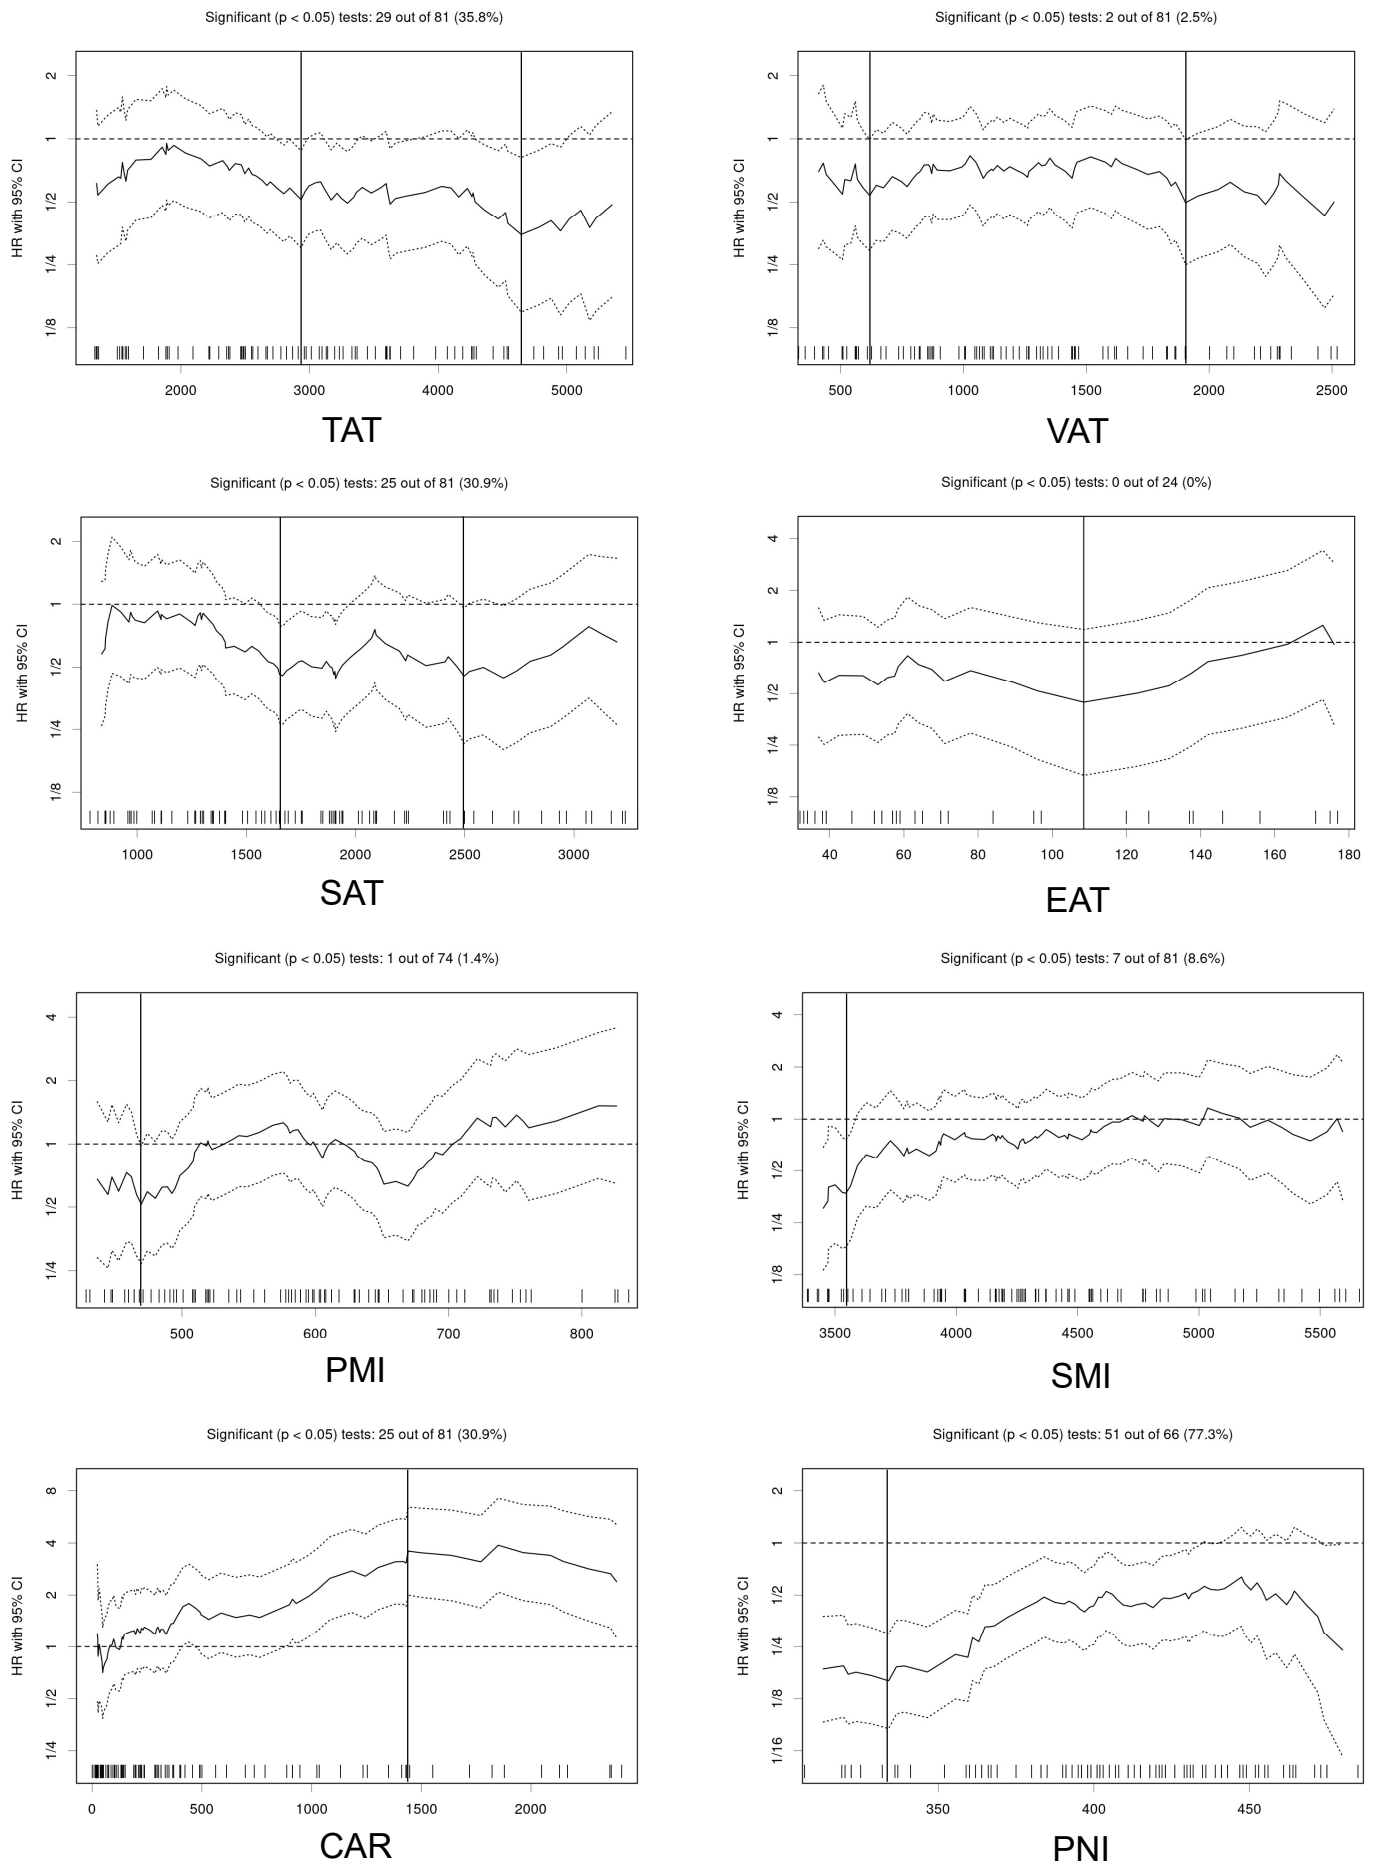

**Fig. S4 Definition of cut-offs based on an optimal log rank test-based separation of the patient cohort.** Body composition cut-offs were defined with the free-to-use webtool “Cutoff Finder” ([https://molpathoheidelberg.shinyapps.io/CutoffFinder\\_v1/](https://molpathoheidelberg.shinyapps.io/CutoffFinder_v1/), last accessed: 11/08/22). Patient cohorts were defined based on optimal separation in the log-rank test when compared for overall survival. Hazard Ratio (HR) and 95% Confidence Intervals as well as number of (significant) performed tests over the entire span of parameter values are shown. Abbreviations: CAR = CRP-to-albumin ratio, HR = hazard ratio, P/SMI = psoas/skeletal muscle index, PNI = Prognostic Nutritional Index, T/S/V/EAT = total/subcutaneous/visceral/epicardial adipose tissue.

### Correlation: P-Value

|            |            |            |            |            |            |            |            |            |                |            |            |            |
|------------|------------|------------|------------|------------|------------|------------|------------|------------|----------------|------------|------------|------------|
| <b>BMI</b> | 0.01       | 2.45e-007  | 0.20       | 0.56       | 0.05       | 0.82       | 0.49       | 0.10       | 0.17           | 2.44e-004  | 3.62e-004  | 0.03       |
| <b>TAT</b> | 0.04       | 7.01e-004  | 0.52       | 0.77       | 0.03       | 0.48       | 0.95       | 0.40       | 0.10           | 1.33e-003  | 0.05       | 0.03       |
| <b>SAT</b> | 0.21       | 0.04       | 0.54       | 0.46       | 0.03       | 0.35       | 0.53       | 0.36       | 0.12           | 2.07e-003  | 0.02       | 4.65e-003  |
| <b>VAT</b> | 0.01       | 2.54e-005  | 0.52       | 0.81       | 0.16       | 0.97       | 0.82       | 0.53       | 0.21           | 0.01       | 0.30       | 0.31       |
| <b>PMI</b> | X          | 1.91e-013  | 0.77       | 0.63       | 0.03       | 0.90       | 0.47       | 0.96       | 0.11           | 0.02       | 0.01       | 0.01       |
| <b>SMI</b> | 1.91e-013  | X          | 0.77       | 0.96       | 2.32e-003  | 0.93       | 0.94       | 0.86       | 4.52e-003      | 0.02       | 0.03       | 0.17       |
| <b>PNI</b> | 0.03       | 2.32e-003  | 1.79e-007  | 1.38e-005  | X          | 5.30e-006  | 7.13e-004  | 5.92e-006  | 9.13e-045      | 0.33       | 0.80       | 4.98e-011  |
|            | <b>PMI</b> | <b>SMI</b> | <b>CAR</b> | <b>NLR</b> | <b>PNI</b> | <b>STL</b> | <b>LDH</b> | <b>CRP</b> | <b>Albumin</b> | <b>WBC</b> | <b>ANC</b> | <b>ALC</b> |

**Fig. S5 Heatmap showing p-values to respective Spearman correlation coefficient (linked to Figure 5A in manuscript).** Numbers display p-value to Spearman correlation of the investigated variables. Yellow filled squares display correlations with p-values < 0.1. Red filled squares display correlations with p-values < 0.05.

**A**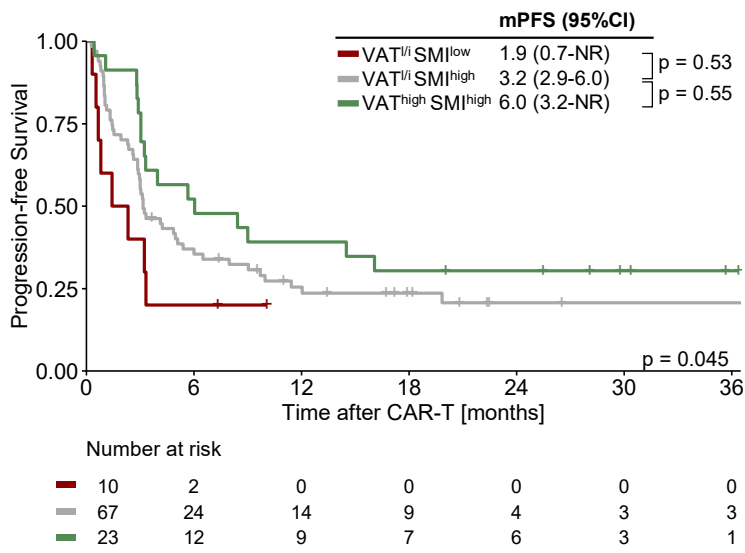**B**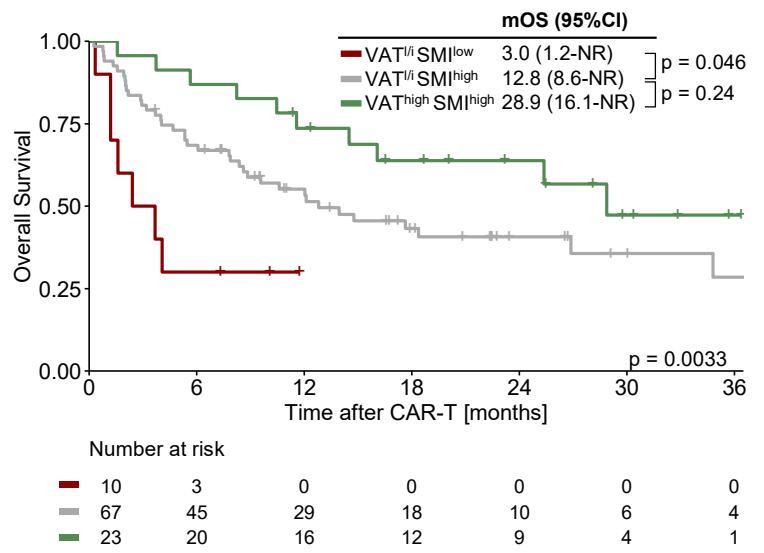

**Fig. S6 A higher amount of muscle mass combined with increased visceral adipose tissue is associated with a superior survival in CD19.CAR-T patients.** Kaplan-Meier estimates of progression-free survival (**A**) and overall survival (**B**) stratified by a combination of visceral adipose tissue (VAT) and skeletal muscle index (SMI). VAT low-intermediate (l/i) was defined as <190 cm<sup>2</sup> and SMI low was defined as <34.5 cm<sup>2</sup>. The respective median survival in months is depicted above the graph. The p-value of the Mantel-Cox Log-rank test is denoted on the graph inset. Abbreviations: 95%CI = 95% confidence interval, mOS = median overall survival, mPFS = median progression-free survival.
